# Supplementary material for: Pre-existing Fc profiles shape the evolution of neutralizing antibody breadth following influenza vaccination
Source: PubMed Central journal article supplement — Cell Rep Med. 2023 Mar 14;4(3):100975. doi: 10.1016/j.xcrm.2023.100975 (PMC10040413; doi:10.1016/j.xcrm.2023.100975), 2023-03-14
Supplement: mmc1.pdf [file mmc1.pdf]

**Cell Reports Medicine, Volume 4**

**Supplemental information**

**Pre-existing Fc profiles shape the evolution  
of neutralizing antibody breadth  
following influenza vaccination**

**Carolyn M. Boudreau, John S. Burke IV, Alexander L. Roederer, Matthew J. Gorman, Sophia Mundle, Daniel Lingwood, Simon Delagrave, Saranya Sridhar, Ted M. Ross, Harry Kleanthous, and Galit Alter**

| Influenza strain                | Abbreviation |
|---------------------------------|--------------|
| H1N1 A/South Carolina/1/1918    | H1SC18       |
| H1N1 A/Puerto Rico/8/1934       | H1PR34       |
| H1N1 A/Weiss/1943               | H1We43       |
| H1N1 A/Fort Monmouth/1/1947     | H1FM47       |
| H1N1 A/Denver/1957              | H1De57       |
| H1N1 A/New Jersey/1976          | H1NJ76       |
| H1N1 A/USSR/90/1977             | H1USSR77     |
| H1N1 A/Brazil/11/1978           | H1Bz78       |
| H1N1 A/California/10/1978       | H1CA78       |
| H1N1 A/Chile/1/1983             | H1Ch83       |
| H1N1 A/Singapore/6/1986         | H1Si68       |
| H1N1 A/Texas/36/1991            | H1TX91       |
| H1N1 A/Beijing/262/1995         | H1Bei95      |
| H1N1 A/New Caledonia/29/1999    | H1NC99       |
| H1N1 A/Solomon Islands/03/2006  | H1SI06       |
| H1N1 A/Brisbane/59/2007         | H1Br07       |
| H1N1 A/California/07/2009       | H1CA09       |
| H1N1 A/Michigan/45/2015         | H1Mi15       |
| H3N2 A/Hong Kong/1/1968         | H3HK68       |
| H3N2 A/Port Chalmers/12/1973    | H3PC73       |
| H3N2 A/Texas/1/1977             | H3TX77       |
| H3N2 A/Mississippi/1/1985       | H3MS85       |
| H3N2 A/Sichuan/60/1989          | H3Sich89     |
| H3N2 A/Shangdong/9/1993         | H3Shan93     |
| H3N2 A/Nanchang/933/1995        | H3Nan95      |
| H3N2 A/Sydney/5/1997            | H3Syd97      |
| H3N2 A/Panama/2007/1999         | H3Pa99       |
| H3N2 A/Fujian/411/2002          | H3Fu02       |
| H3N2 A/New York/55/2004         | H3NY04       |
| H3N2 A/Wisconsin/67/2005        | H3WI05       |
| H3N2 A/Brisbane/10/2007         | H3Br07       |
| H3N2 A/Kentucky/UR07-0028/2008  | H3Ur07       |
| H3N2 A/Perth/16/2009            | H3Pe09       |
| H3N2 A/Victoria/361/2011        | H3Vi11       |
| H3N2 A/Texas/50/2012            | H3TX12       |
| H3N2 A/Switzerland/9715293/2013 | H3Sw13       |
| H3N2 A/Hong Kong/4801/2014      | H3HK14       |
| B/Lee/1940                      | BLee40       |
| B/Yamagata/16/1988              | BYam88       |
| B/Harbin/7/1994                 | BHar94       |
| B/Sichuan/379/1999              | BSich99      |
| B/Hong Kong/330/2001            | BHK01        |
| B/Malaysia/2506/2004            | BMal04       |
| B/Florida/4/2006                | BFL06        |
| B/Brisbane/60/2008              | BBr08        |
| B/Wisconsin/1/2010              | BWI10        |
| B/Texas/06/2011                 | BTX11        |
| B/Massachusetts/2/2012          | BMA12        |
| B/Phuket/3073/2013              | BPh13        |
| B/Colorado/06/2017              | BCO17        |

**Table S1.**  
*Influenza strains tested in HAI assays, Related to Figure 1A.*

| Influenza strain                | Abbreviation | Ag-specific Ab isotype titers & FcR binding                            |                                                                                             | Ag-specific Ab isotype & FcR binding affinity |                                                                                             | Ag-specific Ab functions               |                      | Ag-specific Ab glycosylation |          |
|---------------------------------|--------------|------------------------------------------------------------------------|---------------------------------------------------------------------------------------------|-----------------------------------------------|---------------------------------------------------------------------------------------------|----------------------------------------|----------------------|------------------------------|----------|
|                                 |              | Cohort 1                                                               | Cohort 2                                                                                    | Cohort 1                                      | Cohort 2                                                                                    | Cohort 1                               | Cohort 2             | Cohort 1                     | Cohort 2 |
|                                 |              | FCGR2A<br>FCGR2B<br>FCGR3A<br>IgA1<br>IgG1<br>IgG3<br>IgM<br>Total IgG | FCGR2A<br>FCGR2B<br>FCGR3A<br>FCGR3B<br>IgA1<br>IgA2<br>IgG1<br>IgG2<br>IgG3<br>IgG4<br>IgM |                                               | FCGR2A<br>FCGR2B<br>FCGR3A<br>FCGR3B<br>IgA1<br>IgA2<br>IgG1<br>IgG2<br>IgG3<br>IgG4<br>IgM | ADCP<br>ADNP<br>ADCD<br>ADNKA<br>ADDCP | ADCP<br>ADNP<br>ADCD |                              |          |
| H1N1 A/Chile/1/1983             | H1Ch83       | HA                                                                     | HA                                                                                          |                                               | HA                                                                                          |                                        |                      |                              |          |
| H1N1 A/New Caledonia/29/1999    | H1NC99       | HA                                                                     | HA                                                                                          |                                               | HA                                                                                          |                                        |                      |                              |          |
| H1N1 A/Brisbane/59/2007         | H1Br07       | HA                                                                     | HA                                                                                          |                                               | HA                                                                                          |                                        |                      |                              |          |
| H1N1 A/California/07/2009       | H1CA09       | HA, NA                                                                 | HA, NA                                                                                      |                                               | HA, NA                                                                                      | HA                                     | HA                   | HA                           |          |
| H1N1 A/Michigan/45/2015         | H1Mi15       |                                                                        | NA                                                                                          |                                               | NA                                                                                          |                                        |                      |                              |          |
| H1N1 A/Belgium/145-MA/2009      | H1Be09       |                                                                        | NA                                                                                          |                                               | NA                                                                                          |                                        |                      |                              |          |
| H1 stabilized stem              | H1 stem      | HA                                                                     | HA                                                                                          |                                               | HA                                                                                          |                                        |                      |                              |          |
| H3N2 A/Panama/2007/1999         | H3Pa99       | HA                                                                     | HA                                                                                          |                                               | HA                                                                                          |                                        |                      |                              |          |
| H3N2 A/Brisbane/10/2007         | H3Br07       | HA                                                                     | HA                                                                                          |                                               | HA                                                                                          |                                        |                      |                              |          |
| H3N2 A/Texas/50/2012            | H3TX12       | HA, NA                                                                 | HA, NA                                                                                      |                                               | HA, NA                                                                                      | HA                                     | HA                   | HA, NA                       |          |
| H3N2 A/Switzerland/9715293/2013 | H3Sw13       | HA                                                                     | HA, NA                                                                                      |                                               | HA, NA                                                                                      |                                        |                      |                              |          |
| H3N2 A/Hong Kong/4801/2014      | H3HK14       | HA, NA                                                                 | HA, NA                                                                                      |                                               | HA, NA                                                                                      |                                        |                      |                              |          |
| H3N2 A/Singapore/19/2016        | H3Si16       | HA                                                                     | HA                                                                                          |                                               | HA                                                                                          |                                        |                      |                              |          |
| H3 stabilized stem              | H3 stem      |                                                                        | HA                                                                                          |                                               | HA                                                                                          |                                        |                      |                              |          |
| B/Brisbane/60/2008              | BBr08        | HA                                                                     | HA                                                                                          |                                               | HA                                                                                          |                                        |                      |                              |          |
| B/Phuket/3073/2013              | BPh13        | HA                                                                     | HA, NA                                                                                      |                                               | HA, NA                                                                                      |                                        |                      |                              |          |
| B/Colorado/06/2017              | BCO17        | HA                                                                     | HA, NA                                                                                      |                                               | HA, NA                                                                                      |                                        |                      |                              |          |

**Table S2.**

*Systems serologic measurements by sample cohort and influenza strain, Related to Figures 1-4.*

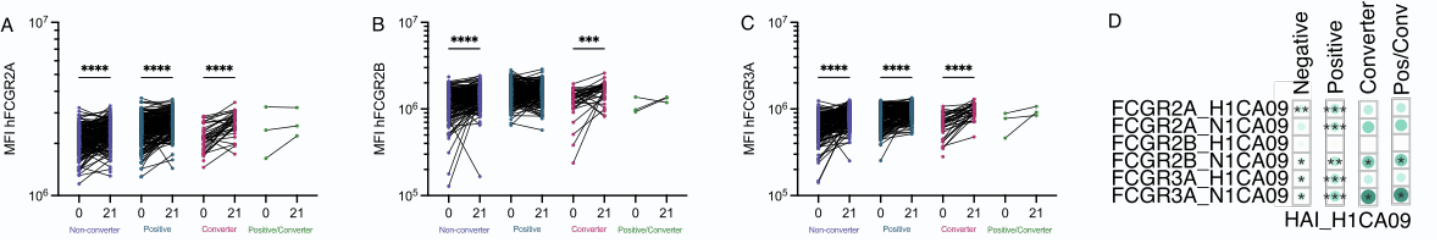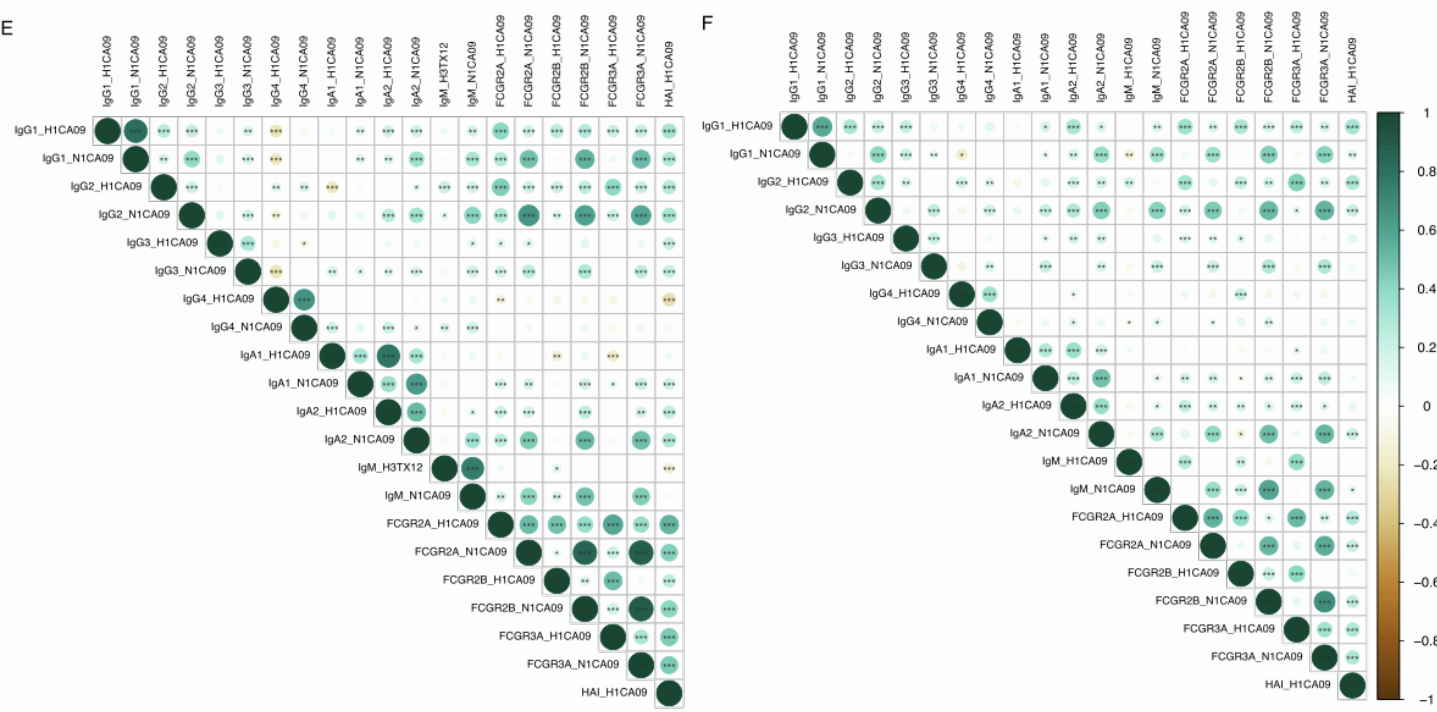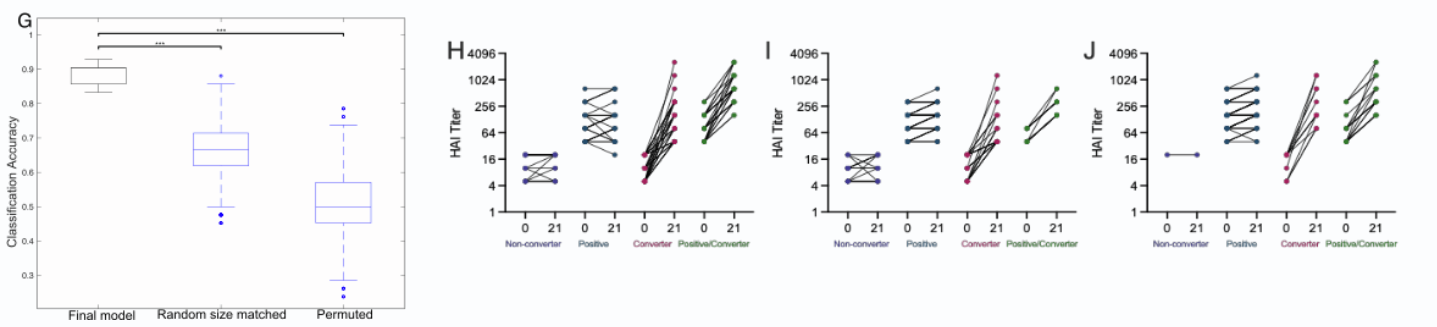

**Figure S1.** *HAI titers, influenza-specific antibody isotype levels, and influenza-specific FcγR binding levels are highly correlated pre-vaccination but come partially unlinked in the response to vaccination, Related to Figure 1.* Line plots (A-C) shows before-and-after FcR binding levels against H1N1 A/California/07/2009, with individuals broken out into groups based on HAI seroconversion as described. Significance tested by one-way ANOVA with Holm-Sidak posttest to compare between day 0 versus day 21. \*\*\*\*  $p < 0.0001$ . Spearman correlations were calculated between antibody measures for delta pre-to-post vaccination samples between HAI and FcR binding by HAI seroconversion groups (D). Spearman correlations were also calculated across the entire population at day 21 post vaccination (E) or delta pre-to-post-vaccination samples (F) in cohort two and plotted using the corrplot package in R. Stronger correlations are represented by larger circles. Asterisks represent significance as calculated by the ggcorplot package for Spearman correlations; \*  $p < 0.05$ , \*\*  $p < 0.01$ , \*\*\*  $p < 0.001$ . Box plot (G) shows model accuracy for LASSO classification model, random size matched models, and permuted label models. LASSO was run for 20 replicates of 5-fold data separation. Random size matched and permuted label models were run 100 permutations per replicate. Stars indicate significance by unpaired, two-tailed T tests. \*\*\*  $p < 0.001$ . Line plots show before-and-after HAI titers against (H) H3N2 A/Texas/50/2012, (I) B/Brisbane/60/2008, and (J) B/Massachusetts/2/2012 with individuals broken out into groups based on HAI conversion for each strain: 1) individuals that did not experience seroconversion (non-converters), 2) individuals who were HAI positive prior to vaccination and did not experience significant increase in HAI titer (positives), 3) individuals who had sub-protective HAI titers prior to vaccination but seroconverted following vaccination (converters), and 4) individuals who were HAI positive prior to vaccination but saw a significant (greater than or equal to four-fold) increase in HAI titer following vaccination (positive/converters). This figure represents data from the Investigation cohort.

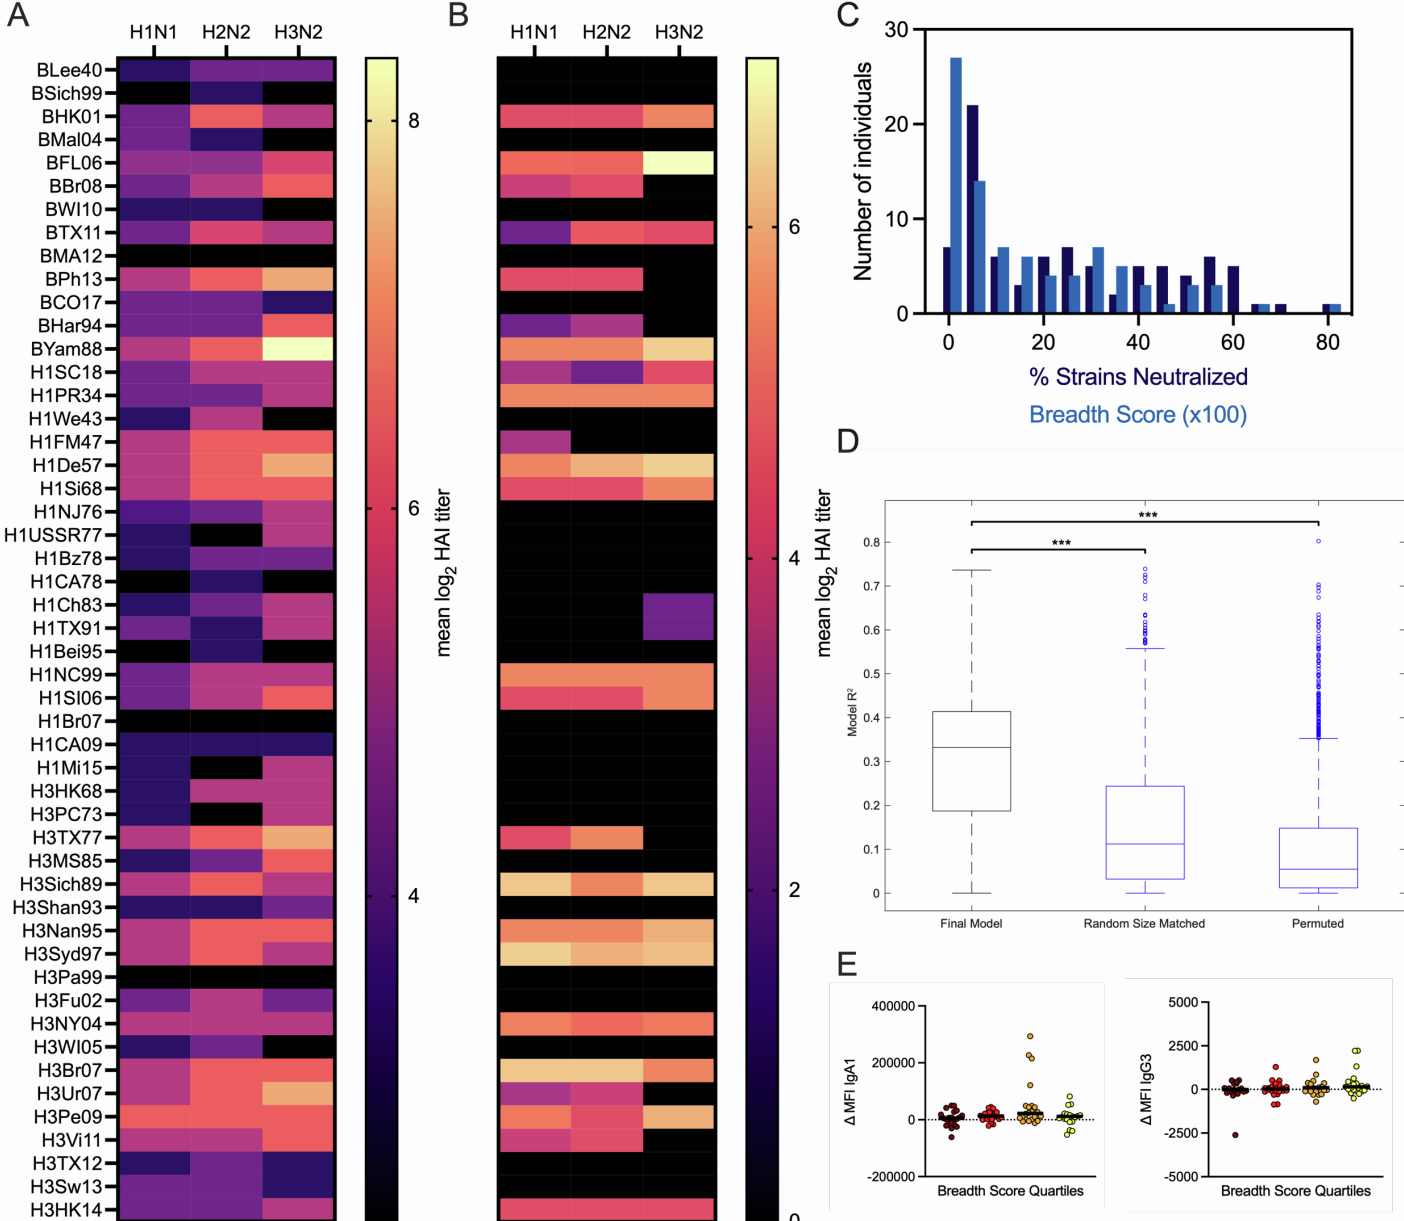

**Figure S2.**

*Pre-existing and vaccine-induced HAI responses are not heavily impacted by immunological imprinting but do correlate with development of FcR binding antibodies, Related to Figure 2.*

Individuals from the Investigation cohort were grouped by their year of birth into three discrete immunological imprinting eras (H1N1 1920-1954, H2N2 1955-1966, H3N2 1966-2005 (Arevalo et al., 2020)) with each era represented in a column. Heatmap (A) shows pre-existing responses to each tested virus by row with coloring by the mean log<sub>2</sub>-transformed HAI titer for the group; Heatmap (B) shows delta day 21- day 0 vaccine-induced responses. Histogram (C) shows both percentage seroconversion (dark blue) and breadth score (light blue) for the first Discovery cohort. Percentage of strains neutralized does not take into account genetic sequence diversity of strains, while the breadth score does. Box plot (D) shows model accuracy (R<sup>2</sup>) for LASSO-Elastic Net classification model in Figure 2, random size matched models, and permuted label models. LASSO-Elastic Net was run for 20 replicates of 5-fold data separation. Random size matched and permuted label models were run 100 permutations per replicate. Stars indicate significance by unpaired, two-tailed T tests. \*\*\* p < 0.001. Dot plots (E) show additional LASSO-Elastic Net selected features as univariate plots binned by quartile of breadth score. Significance was tested by Kruskal-Wallis test followed by Dunn's multiple comparisons correction. Not significant.

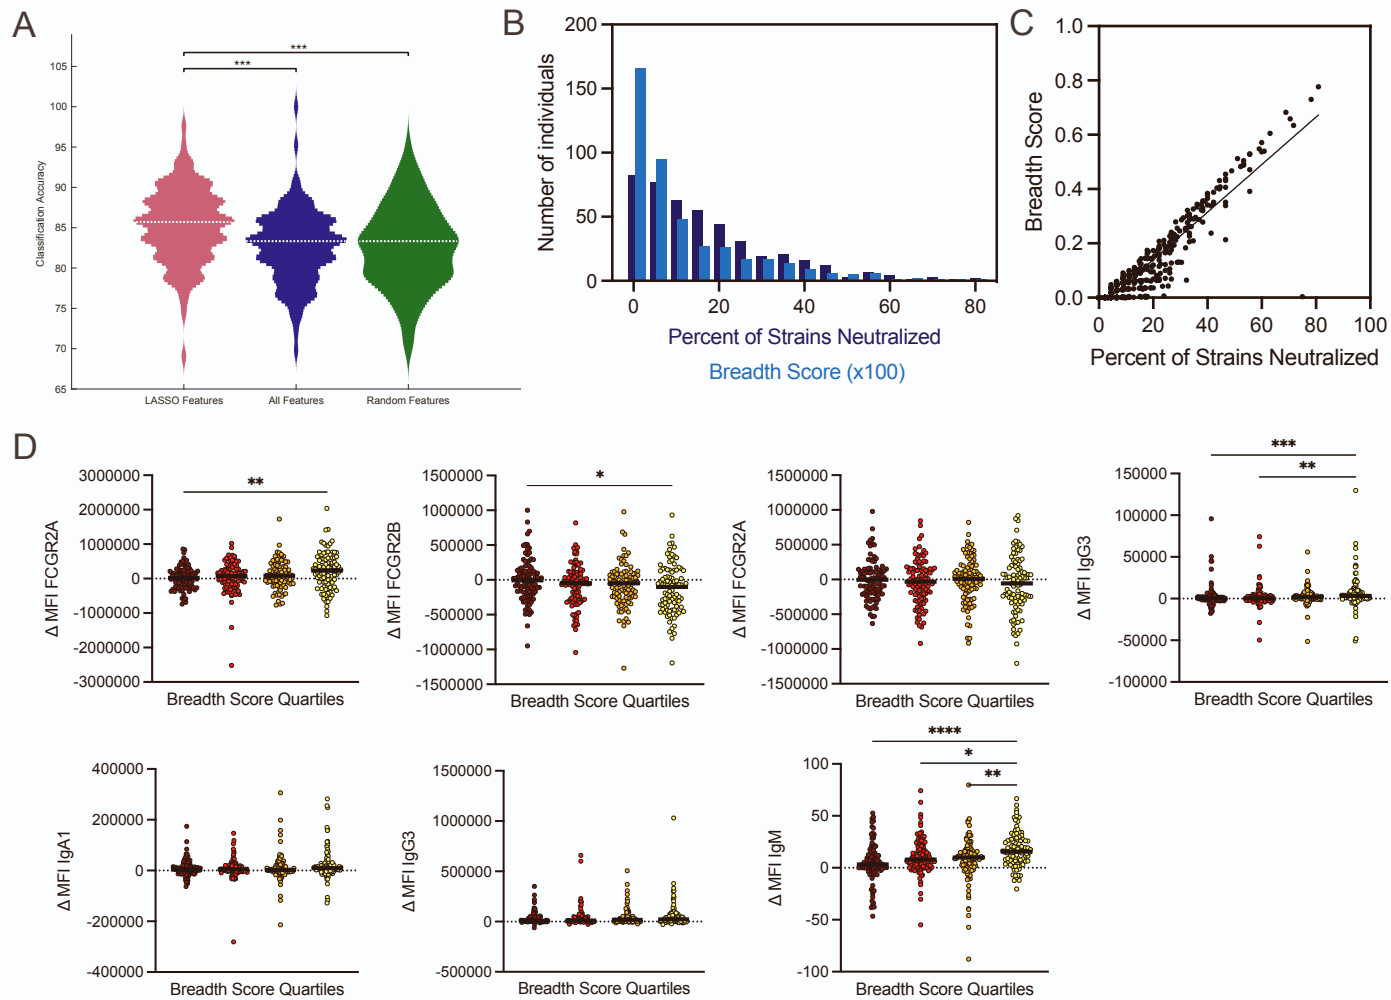

**Figure S3.**

*Validation of the seroconversion model in Figure 1 with an orthogonal cohort, Related to Figure 3.* Violin plot (A) shows comparison of seroconversion model in Figure 1 with an orthogonal cohort. Histogram (B) shows both percentage seroconversion and breadth score for the second Investigative cohort. Dot plot (C) shows correlation between percentage of strains seroconverted and breadth score for the second Investigative cohort. Dot plots (D) show LASSO-Elastic Net selected features as univariate plots binned by quartile of breadth score. Significance was tested by Kruskal-Wallis test followed by Dunn's multiple comparisons correction. \*  $p < 0.05$ , \*\*  $p < 0.01$ , \*\*\*  $p < 0.001$ .

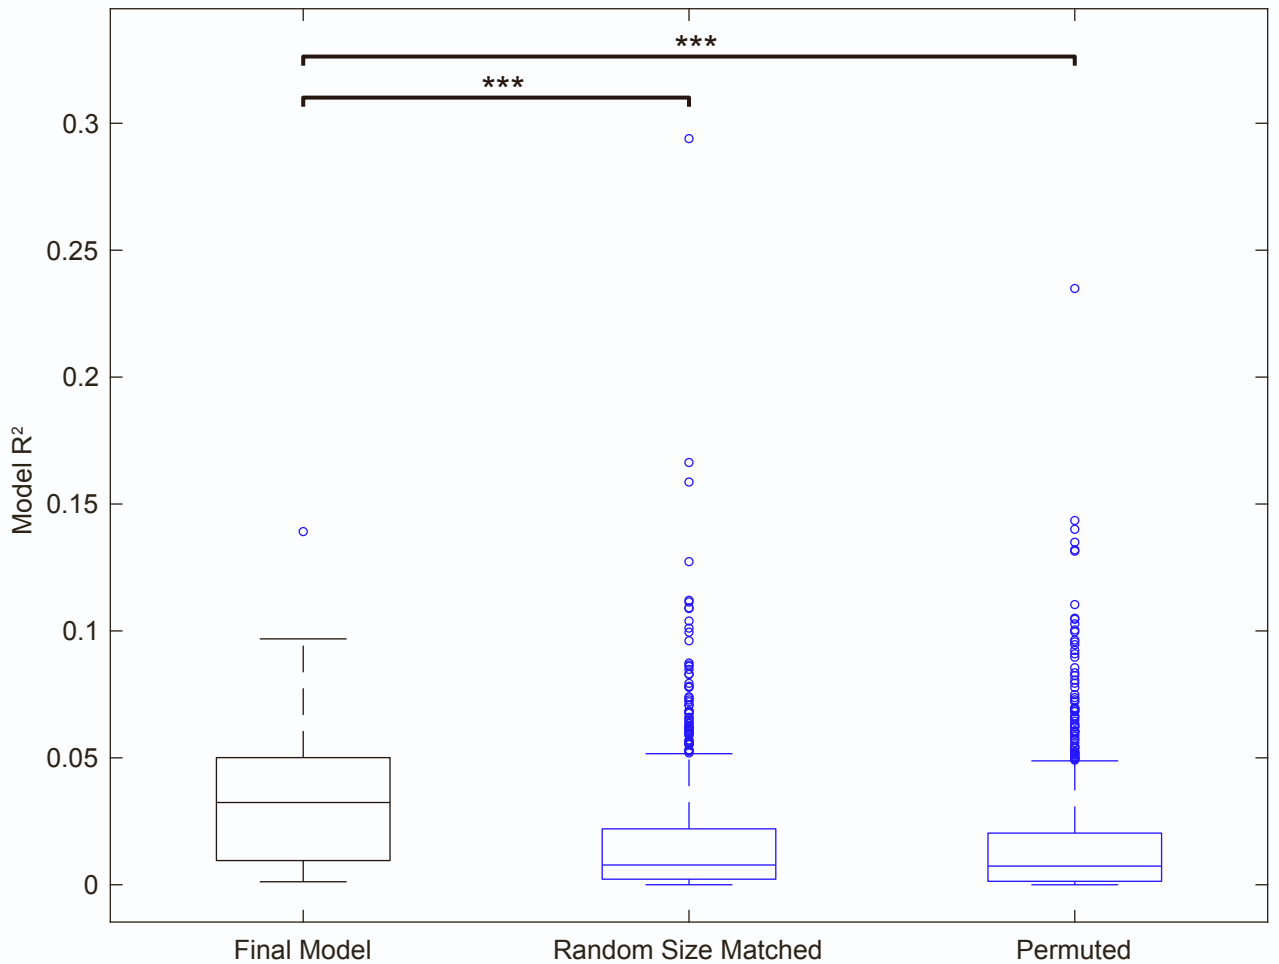

**Figure S4.**

*Accuracy and significance of breadth model in Figure 4A.* Box plot shows model accuracy ( $R^2$ ) for LASSO-Elastic Net classification model, random size matched models, and permuted label models. LASSO-Elastic Net was run for 20 replicates of 5-fold data separation. Random size matched and permuted label models were run 100 permutations per replicate. Stars indicate significance by unpaired, two-tailed T tests. \*\*\*  $p < 0.001$ .



**A**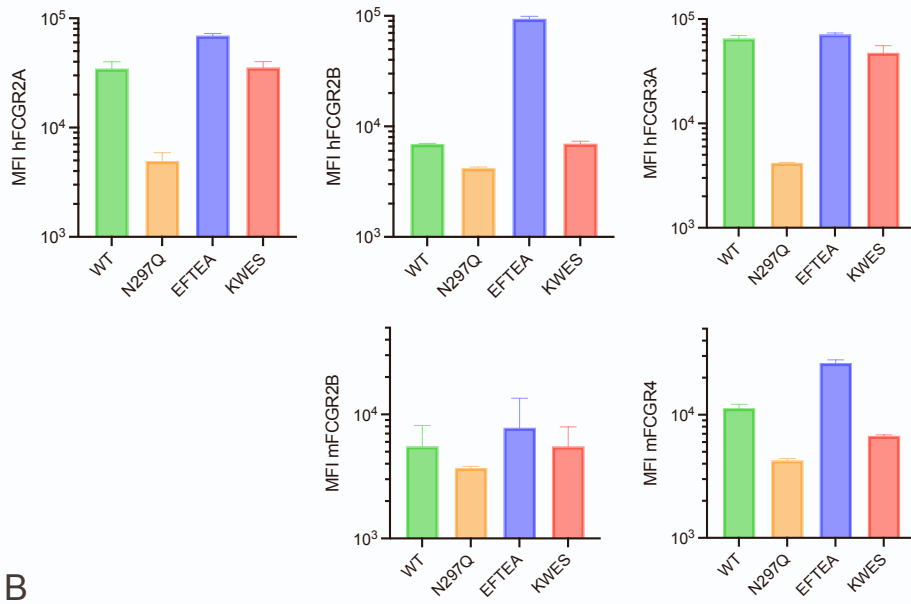**B**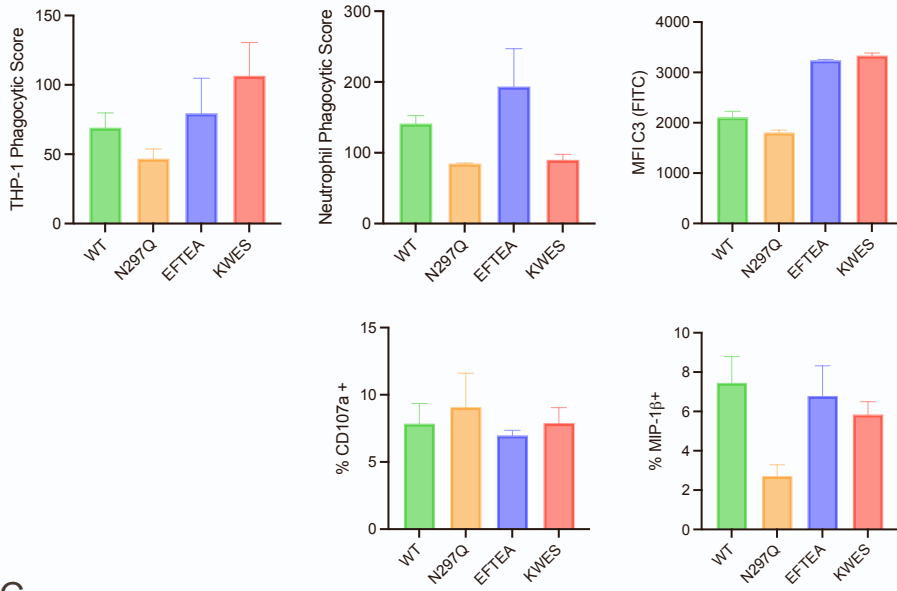**C**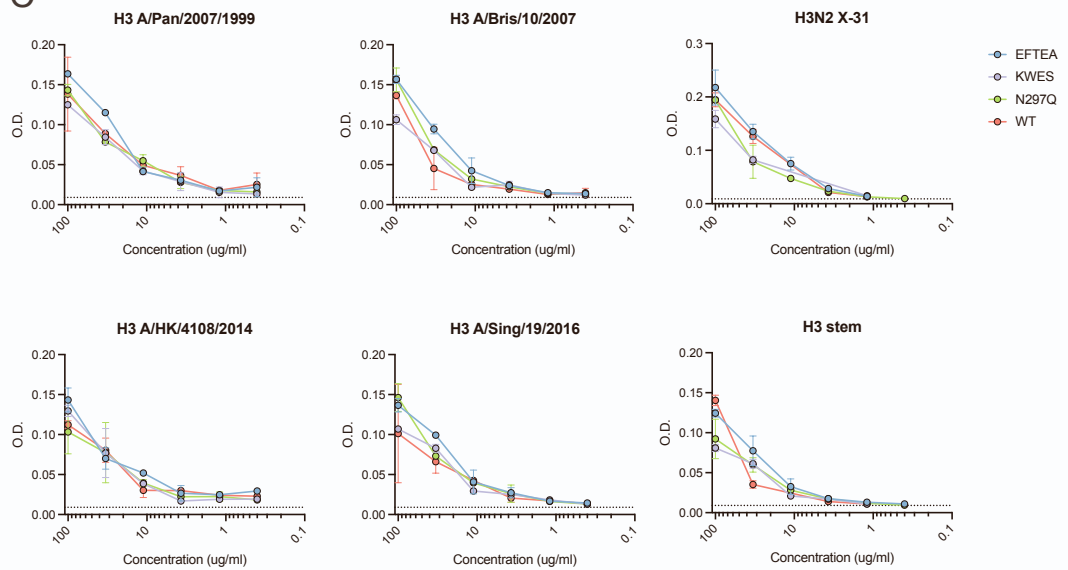

**Figure S5.**

*CR9114 Fc variant antibodies show different FcR binding and Fc functional profiles but bind to the same influenza antigens, related to Figure 5. (A) shows relative binding to human and mouse FcγRs by H3 stem-specific Luminex analysis. (B) shows antibody functionality in phagocytosis, complement deposition and NK cell activation. Bars show mean and standard deviation of duplicates. (C) Line plots show serial dilution curves for CR9114 variants binding to H3N2 antigens. Each point represents two independent measurements.*

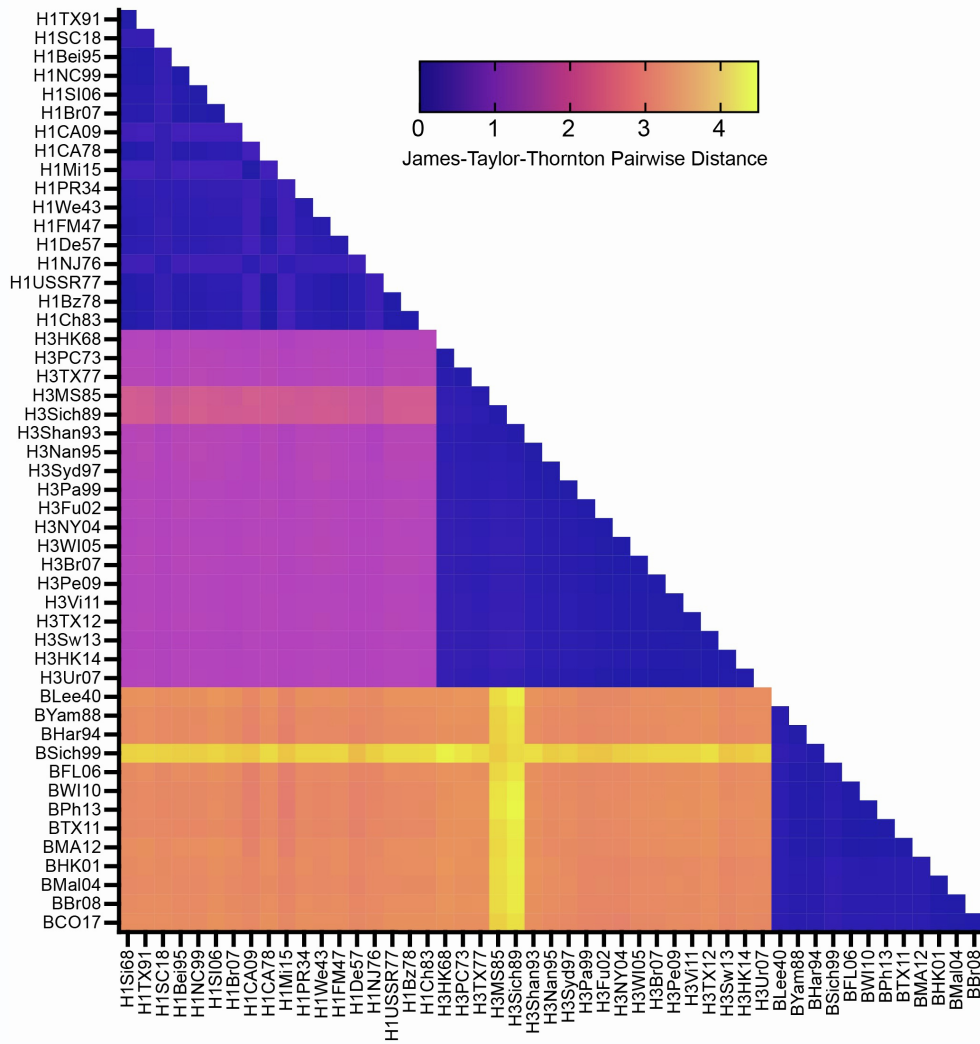

**Figure S6.** *Pairwise distance between tested strains of influenza, Related to STAR Methods.* Heatmap shows James-Taylor-Thornton pairwise distances between each pair of tested influenza strains.
